# Supplementary material for: A Novel Preparation Technique for Human Nasal Respiratory Mucosa to Disclose Its Glycosylation Pattern for Bioadhesive Drug Delivery
Source: Pharmaceutics. 2023 Mar 17;15(3):973. doi: 10.3390/pharmaceutics15030973 (PMC10052101; doi:10.3390/pharmaceutics15030973)
Supplement: Supplementary file 1 [file pharmaceutics-15-00973-s001.zip › pharmaceutics-2225732-supplementary.pdf]

**Table S1.** Concentrations (nM) of mucosa-associated lectins at 4 °C and 37 °C.

| Lectin         | Amount of lectin [nM]<br>(mean ± SD) |                |                | Two-tailed P value      |                             |
|----------------|--------------------------------------|----------------|----------------|-------------------------|-----------------------------|
|                | 4 °C                                 | 37 °C/R1       | 37 °C/R2       | 4 °C<br>vs.<br>37 °C/R1 | 37 °C/R1<br>vs.<br>37 °C/R2 |
|                |                                      |                |                |                         |                             |
| <b>F-WGA</b>   | 225.20 ± 36.26                       | 178.10 ± 28.15 | 135.40 ± 30.55 | <b>0.0011</b>           | <b>&lt;0.0001</b>           |
| <b>F-LCA</b>   | 126.50 ± 26.05                       | 92.95 ± 20.51  | 80.13 ± 24.37  | <b>0.0058</b>           | <b>0.0056</b>               |
| <b>F-UEA I</b> | 104.30 ± 9.38                        | 73.21 ± 11.56  | 49.59 ± 8.35   | <b>&lt;0.0001</b>       | <b>0.0003</b>               |
| <b>F-GNL</b>   | 98.45 ± 16.57                        | 70.00 ± 12.51  | 56.97 ± 13.93  | <b>0.0004</b>           | <b>&lt;0.0001</b>           |
| <b>F-STL</b>   | 75.47 ± 12.55                        | 70.33 ± 17.05  | 50.63 ± 9.93   | 0.1318                  | <b>0.0004</b>               |
| <b>F-PNA</b>   | 59.39 ± 9.46                         | 34.74 ± 5.45   | 25.57 ± 7.34   | <b>&lt;0.0001</b>       | <b>&lt;0.0001</b>           |

Values at 37 °C were obtained before washing (37 °C/R1) and after washing (37 °C/R2) of the human nasal mucosa. Statistical differences were assessed by a paired t-test. P values in bold indicate statistically significant differences between comparisons. Results were considered statistically significant if  $p \leq 0.05$ . Binding data is presented in Figure 2 and Figure 4; statistical significance is displayed in Figure 4.

**Table S2.** Multiple comparisons of lectin binding data at 4 °C and 37 °C.

| Lectin         | Adjusted P value |                    |
|----------------|------------------|--------------------|
|                | 4 °C             | 37 °C              |
| <b>F-WGA</b>   | vs. F-LCA        | 0.0019             |
|                | vs. F-UEA I      | 0.0002             |
|                | vs. F-GNL        | <b>&lt; 0.0001</b> |
|                | vs. F-STL        | <b>&lt; 0.0001</b> |
|                | vs. F-PNA        | <b>&lt; 0.0001</b> |
| <b>F-LCA</b>   | vs F-WGA         | 0.0019             |
|                | vs. F-UEA I      | 0.6639             |
|                | vs. F-GNL        | 0.4948             |
|                | vs. F-STL        | 0.0789             |
|                | vs. F-PNA        | <b>0.0236</b>      |
| <b>F-UEA I</b> | vs F-WGA         | 0.0002             |
|                | vs F-LCA         | 0.6639             |
|                | vs. F-GNL        | 0.9967             |
|                | vs. F-STL        | <b>0.0023</b>      |
|                | vs. F-PNA        | <b>&lt; 0.0001</b> |
| <b>F-GNL</b>   | vs F-WGA         | <b>&lt; 0.0001</b> |

|              |             |                    |               |
|--------------|-------------|--------------------|---------------|
|              | vs F-LCA    | 0.4948             | 0.6035        |
|              | vs. F-UEA I | 0.9967             | 0.9349        |
|              | vs. F-STL   | 0.0954             | 0.9859        |
|              | vs. F-PNA   | <b>0.0016</b>      | <b>0.0020</b> |
| <b>F-STL</b> | vs F-WGA    | <b>&lt; 0.0001</b> | <b>0.0009</b> |
|              | vs. F-LCA   | 0.0789             | 0.3398        |
|              | vs. F-UEA I | <b>0.0023</b>      | > 0.9999      |
|              | vs. F-GNL   | 0.0954             | 0.9859        |
|              | vs. F-PNA   | 0.1430             | <b>0.0010</b> |
| <b>F-PNA</b> | vs F-WGA    | <b>&lt; 0.0001</b> | <b>0.0001</b> |
|              | vs. F-LCA   | <b>0.0236</b>      | 0.0610        |
|              | vs. F-UEA I | <b>&lt; 0.0001</b> | <b>0.0004</b> |
|              | vs. F-GNL   | <b>0.0016</b>      | <b>0.0020</b> |
|              | vs. F-STL   | 0.1430             | <b>0.0010</b> |

Statistical differences were assessed by a Welch's ANOVA test and a Dunnett's T3 multiple comparisons test. P values in bold indicate statistically significant differences between comparisons. Results were considered statistically significant if  $p \leq 0.05$ . Data presented in Figure 2.

**Table S3. Results of uptake studies.**

| Lectin  | Uptake [%]<br>(mean ± SD) |             | Adjusted P value | Uptake [nM]<br>(mean ± SD) |             | Adjusted P value |
|---------|---------------------------|-------------|------------------|----------------------------|-------------|------------------|
| F-WGA   | 18.88 ± 9.85              | vs. F-LCA   | 0.5033           | 47.14 ± 25.03              | vs. F-LCA   | 0.6453           |
|         |                           | vs. F-UEA I | 0.0930           |                            | vs. F-UEA I | 0.2721           |
|         |                           | vs. F-GNL   | 0.2774           |                            | vs. F-GNL   | 0.0929           |
|         |                           | vs. F-STL   | 0.3594           |                            | vs. F-STL   | <0.0001          |
|         |                           | vs. F-PNA   | < 0.0001         |                            | vs. F-PNA   | 0.0249           |
| F-LCA   | 27.22 ± 8.86              | vs F-WGA    | 0.5033           | 35.15 ± 13.87              | vs F-WGA    | 0.6453           |
|         |                           | vs. F-UEA I | 0.9904           |                            | vs. F-UEA I | 0.9990           |
|         |                           | vs. F-GNL   | > 0.9999         |                            | vs. F-GNL   | 0.9544           |
|         |                           | vs. F-STL   | 0.0167           |                            | vs. F-STL   | 0.0185           |
|         |                           | vs. F-PNA   | 0.0955           |                            | vs. F-PNA   | 0.7601           |
| F-UEA I | 30.12 ± 8.18              | vs F-WGA    | 0.0930           | 32.22 ± 8.50               | vs F-WGA    | 0.2721           |
|         |                           | vs F-LCA    | 0.9904           |                            | vs F-LCA    | 0.9990           |
|         |                           | vs. F-GNL   | 0.9939           |                            | vs. F-GNL   | 0.9936           |

|              |              |             |                    |               |             |                   |
|--------------|--------------|-------------|--------------------|---------------|-------------|-------------------|
|              |              | vs. F-STL   | <b>0.0006</b>      |               | vs. F-STL   | <b>0.0163</b>     |
|              |              | vs. F-PNA   | 0.1789             |               | vs. F-PNA   | 0.8771            |
| <b>F-GNL</b> | 27.82 ± 9.34 | vs F-WGA    | 0.2774             | 28.45 ± 12.61 | vs F-WGA    | 0.0929            |
|              |              | vs F-LCA    | > 0.9999           |               | vs F-LCA    | 0.9544            |
|              |              | vs. F-UEA I | 0.9939             |               | vs. F-UEA I | 0.9936            |
|              |              | vs. F-STL   | <b>0.0030</b>      |               | vs. F-STL   | 0.0639            |
|              |              | vs. F-PNA   | 0.0555             |               | vs. F-PNA   | 0.9934            |
|              |              |             |                    |               |             |                   |
| <b>F-STL</b> | 10.62 ± 5.50 | vs F-WGA    | 0.3594             | 8.62 ± 4.47   | vs F-WGA    | <b>&lt;0.0001</b> |
|              |              | vs. F-LCA   | <b>0.0167</b>      |               | vs. F-LCA   | <b>0.0185</b>     |
|              |              | vs. F-UEA I | <b>0.0006</b>      |               | vs. F-UEA I | <b>0.0163</b>     |
|              |              | vs. F-GNL   | <b>0.0030</b>      |               | vs. F-GNL   | 0.0639            |
|              |              | vs. F-PNA   | <b>&lt; 0.0001</b> |               | vs. F-PNA   | 0.2038            |
|              |              |             |                    |               |             |                   |
| <b>F-PNA</b> | 40.34 ± 8.52 | vs F-WGA    | <b>&lt; 0.0001</b> | 24.65 ± 7.80  | vs F-WGA    | <b>0.0249</b>     |
|              |              | vs. F-LCA   | 0.0955             |               | vs. F-LCA   | 0.7601            |
|              |              | vs. F-UEA I | 0.1789             |               | vs. F-UEA I | 0.8771            |
|              |              | vs. F-GNL   | 0.0555             |               | vs. F-GNL   | 0.9934            |
|              |              | vs. F-STL   | <b>&lt; 0.0001</b> |               | vs. F-STL   | 0.2038            |
|              |              |             |                    |               |             |                   |

Statistical differences were assessed by a one-way ANOVA test and a Tukey's multiple comparisons test. P values in bold indicate statistically significant differences between comparisons. Results were considered statistically significant if  $p \leq 0.05$ . Data presented in Figure 5a (Uptake; %) and Figure 5b (Uptake; nm), respectively.

**Table S4.** Reduction of -mucosa-associated lectins by washing.

| Lectin         | Reduction [%]<br>(mean ± SD) | Adjusted P value |
|----------------|------------------------------|------------------|
| <b>F-WGA</b>   | 24.88 ± 6.32                 | vs. F-LCA        |
|                |                              | 0.6136           |
|                |                              | vs. F-UEA I      |
|                |                              | 0.5742           |
|                |                              | vs. F-GNL        |
| <b>F-LCA</b>   | 16.94 ± 6.97                 | 0.8580           |
|                |                              | vs. F-STL        |
|                |                              | 0.9905           |
|                |                              | vs. F-PNA        |
|                |                              | 0.9722           |
| <b>F-UEA I</b> |                              | vs F-WGA         |
|                |                              | 0.6136           |
|                |                              | vs. F-UEA I      |
| <b>F-GNL</b>   |                              | <b>0.0463</b>    |
|                |                              | vs. F-GNL        |
| <b>F-PNA</b>   |                              | 0.9920           |
|                |                              |                  |

|                |               |             |               |
|----------------|---------------|-------------|---------------|
|                |               | vs. F-STL   | 0.3036        |
|                |               | vs. F-PNA   | 0.2381        |
| <b>F-UEA I</b> | 32.11 ± 11.97 | vs F-WGA    | 0.5742        |
|                |               | vs F-LCA    | <b>0.0463</b> |
|                |               | vs. F-GNL   | 0.0797        |
|                |               | vs. F-STL   | 0.8989        |
|                |               | vs. F-PNA   | 0.9481        |
| <b>F-GNL</b>   | 19.83 ± 7.90  | vs F-WGA    | 0.8580        |
|                |               | vs F-LCA    | 0.9920        |
|                |               | vs. F-UEA I | 0.0797        |
|                |               | vs. F-STL   | 0.5102        |
|                |               | vs. F-PNA   | 0.4115        |
| <b>F-STL</b>   | 27.51 ± 6.34  | vs F-WGA    | 0.9905        |
|                |               | vs. F-LCA   | 0.3036        |
|                |               | vs. F-UEA I | 0.8989        |
|                |               | vs. F-GNL   | 0.5102        |
|                |               | vs. F-PNA   | > 0.9999      |
| <b>F-PNA</b>   | 28.23 ± 10.81 | vs F-WGA    | 0.9722        |
|                |               | vs. F-LCA   | 0.2381        |
|                |               | vs. F-UEA I | 0.9481        |
|                |               | vs. F-GNL   | 0.4115        |
|                |               | vs. F-STL   | > 0.9999      |

Statistical differences were assessed by a one-way ANOVA test and a Tukey's multiple comparisons test. P values in bold indicate statistically significant differences between comparisons. Results were considered statistically significant if  $p \leq 0.05$ . Data presented in Figure 6.
